# Supplementary material for: Design of Etched- and Functionalized-Halloysite/Meloxicam Hybrids: A Tool for Enhancing Drug Solubility and Dissolution Rate
Source: MDPI journal article supplement (doi:10.3390/pharmaceutics16030338), 2024-02-28
Supplement: s1 [file s1]

# Design of etched- and functionalized halloysite/meloxicam hybrids: a tool for enhancing drug solubility and dissolution rate

**Valeria Friuli<sup>1,\*</sup>, Claudia Urru<sup>2</sup>, Chiara Ferrara<sup>3</sup>, Debora Maria Conti<sup>2</sup>, Giovanna Bruni<sup>2</sup>, Laretta Maggi<sup>1,\*</sup>, and Doretta Capsoni<sup>2</sup>**

<sup>1</sup> Department of Drug Sciences, University of Pavia, Via Taramelli 12, 27100 Pavia, Italy;  
valeria.friuli@unipv.it (V.F.); laretta.maggi@unipv.it (L.M.)

<sup>2</sup> Department of Chemistry, Physical Chemistry Section & C.S.G.I. (Consorzio Interuniversitario per lo Sviluppo dei Sistemi a Grande

Interfase), University of Pavia, 27100 Pavia, Italy;

claudia.urr01@universitadipavia.it (C.U.); deboramaria.conti01@universitadipavia.it (D.M.C.);  
giovanna.bruni@unipv.it (G.B.); doretta.capsoni@unipv.it (D.C.)

<sup>3</sup> Department of Materials Science, University of Milano-Bicocca, Via Cozzi 55, 20125 Milano, Italy;  
chiara.ferrara@unimib.it (C.F.)

\* Correspondence: valeria.friuli@unipv.it; Tel.: +39-0382-987303; laretta.maggi@unipv.it; Tel.: +39-0382-987367

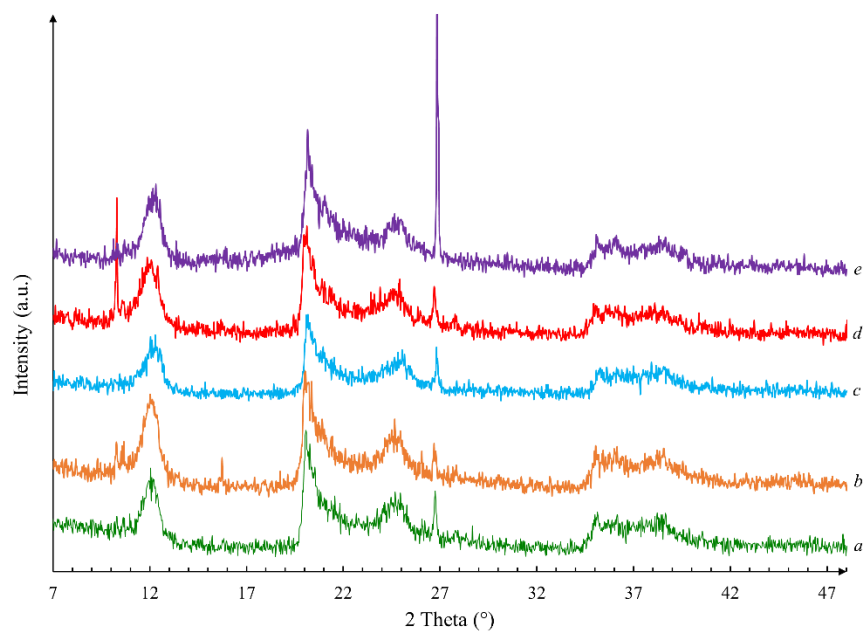

**Figure S1.** XRPD patterns of modified-halloysite samples: (a) H\_HCl\_2M, (b) H\_HCl\_4M, (c) H\_NaOH\_0.5M, (d) H\_A, (e) H\_C.

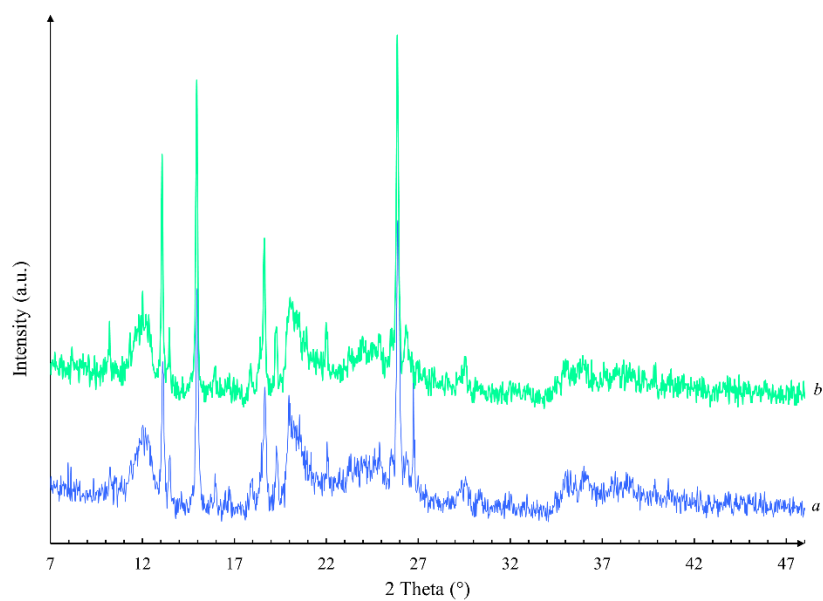

**Figure S2.** XRPD pattern of (a) MH\_HCl\_2M, (b) MH\_HCl\_4M.

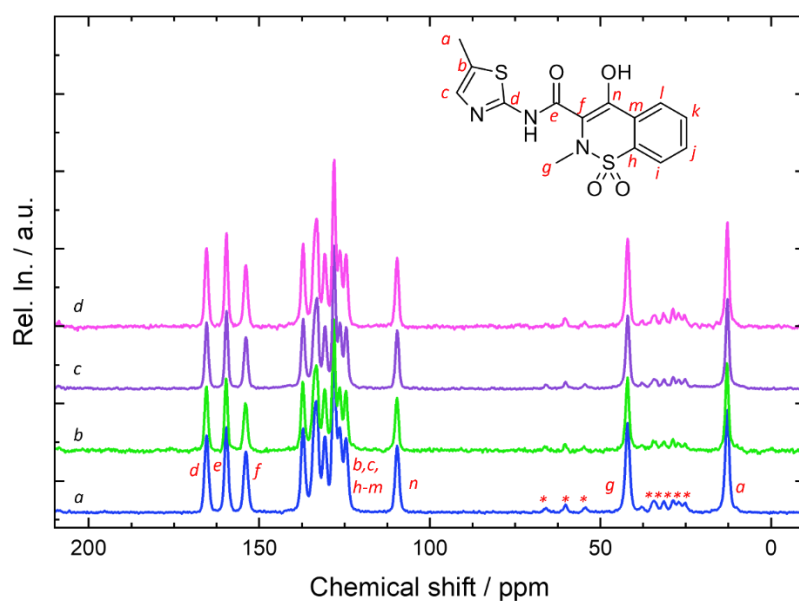

**Figure S3.**  $^{13}\text{C}$  CPMAS spectra for (a) MEL, (b) MH, (c) MH-A, (d) MH-C samples and signals attribution for the MEL pristine compound.

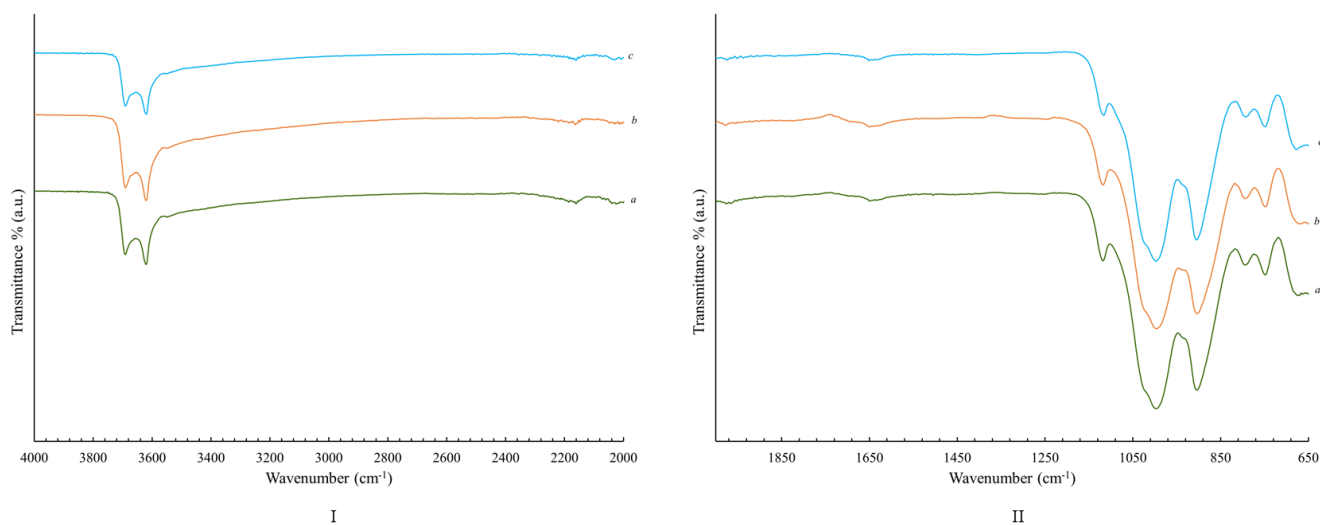

**Figure S4.** FT-IR spectra of (a)  $\text{H}_2\text{C}_2\text{O}_4$ , (b)  $\text{H}_2\text{C}_2\text{O}_4$ , and (c)  $\text{H}_2\text{C}_2\text{O}_4$  in (I) 4000 – 2000  $\text{cm}^{-1}$ , and (II) 2000 – 650  $\text{cm}^{-1}$  wavenumber range.

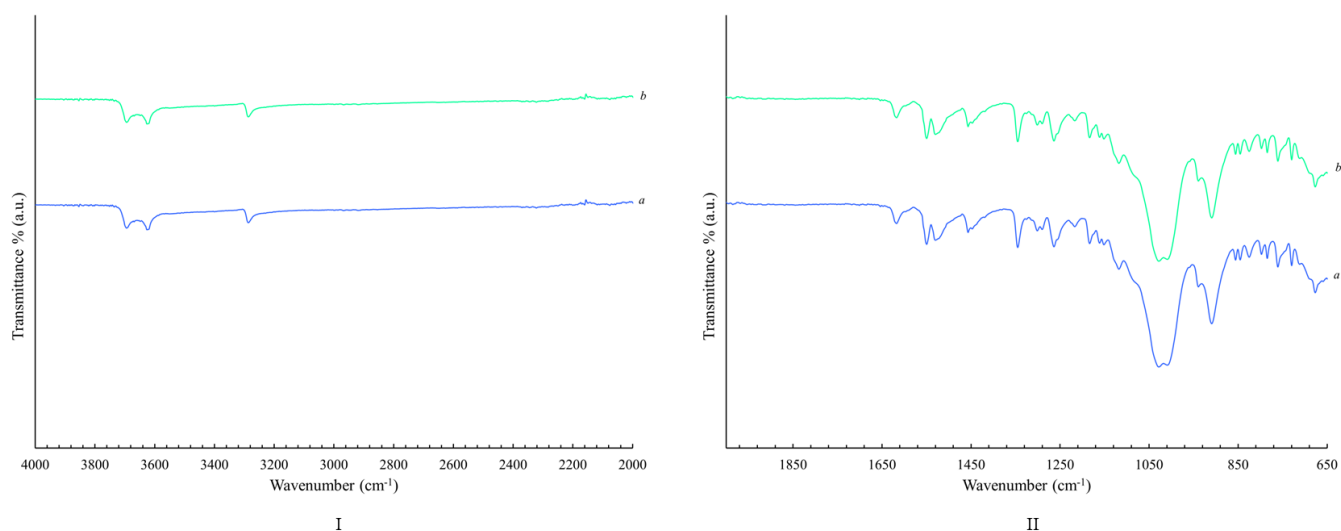

**Figure S5.** FT-IR spectra of (a) MH\_HCl\_2M, and (b) MH\_HCl\_4M in (I) 4000 – 2000  $\text{cm}^{-1}$ , and (II) 2000 – 650  $\text{cm}^{-1}$  wavenumber range.

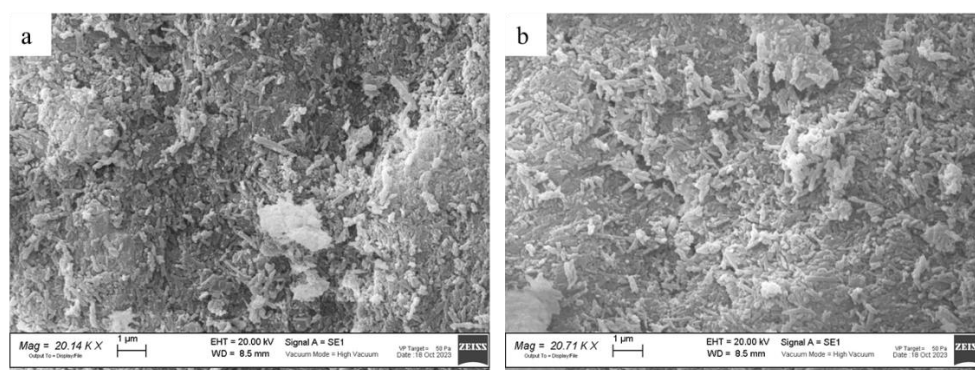

**Figure S6.** SEM images at 20 kX magnification of (a) H\_HCl\_2M, and (b) H\_HCl\_4M.

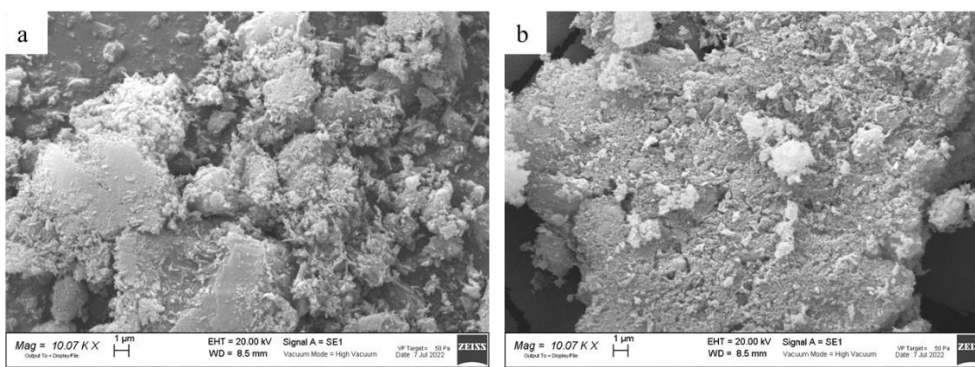

**Figure S7.** SEM images at 10kX magnification of (a) MH\_HCl\_2M, and (b) MH\_HCl\_4M.



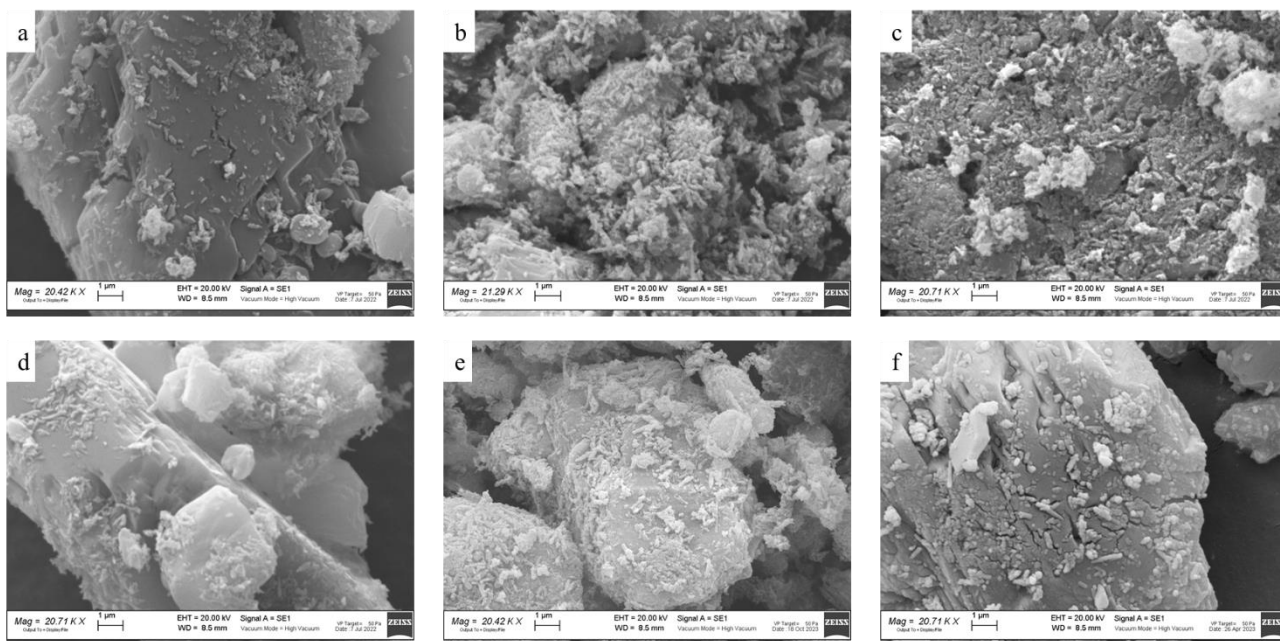

**Figure S8.** SEM images at 20 kX magnification of (a) MH, (b) MH\_HCl\_2M, (c) MH\_HCl\_4M, (d) MH\_NaOH\_0.5M, (e) MH\_A and (f) MH\_CTS.

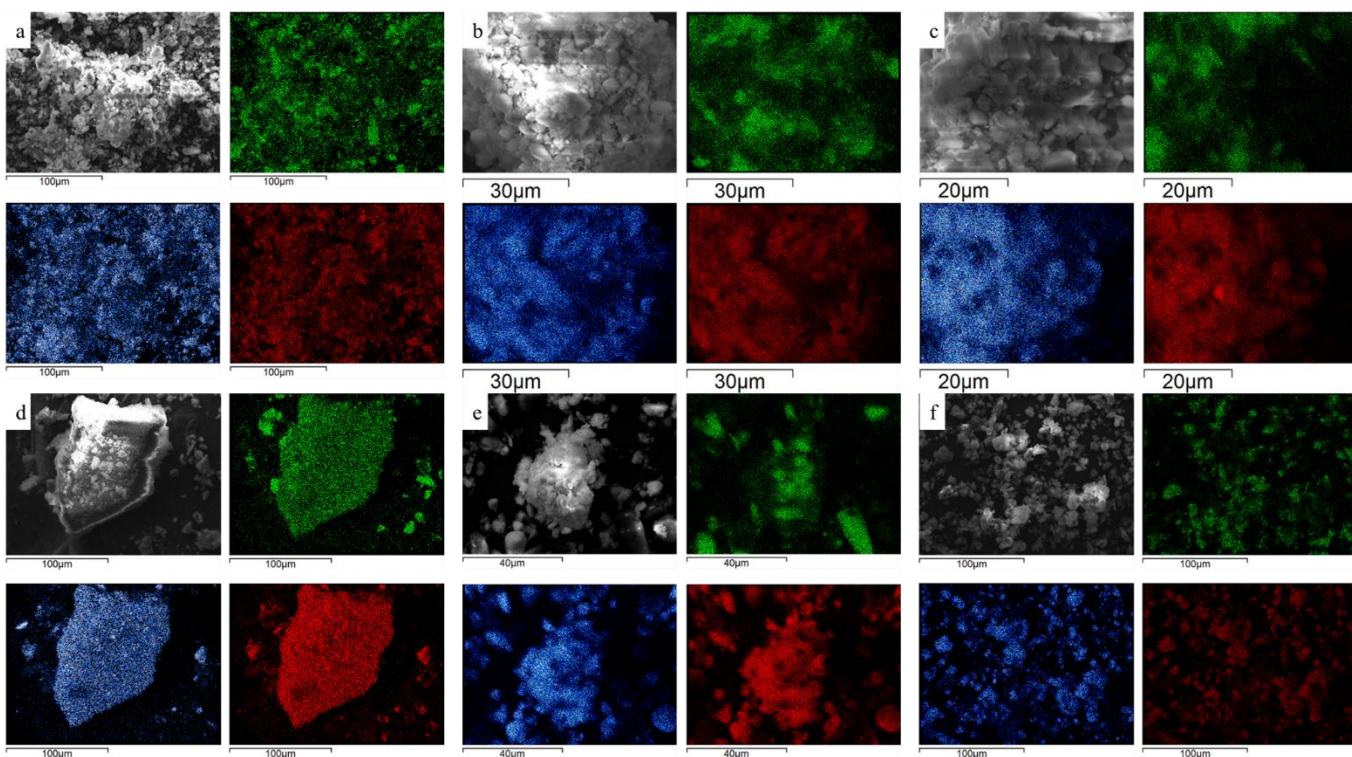

**Figure S9.** EDS analysis: investigated region (gray scale), S (green), Al (Blue) and Si (red) distribution maps for the (a) MH, (b) MH\_HCl\_2M, (c) MH\_HCl\_4M, (d) MH\_NaOH\_0.5M, (e) MH\_A, (f) MH\_C.

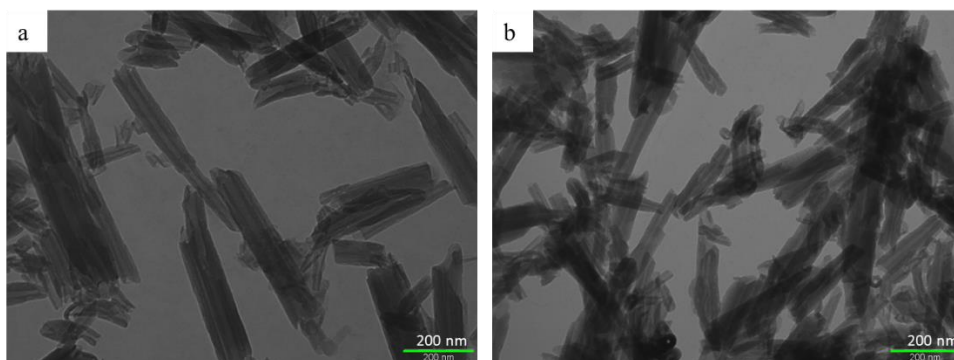

**Figure S10.** TEM images at 100kX magnification of (a) H\_HCl\_2M, and (b) H\_HCl\_4M.

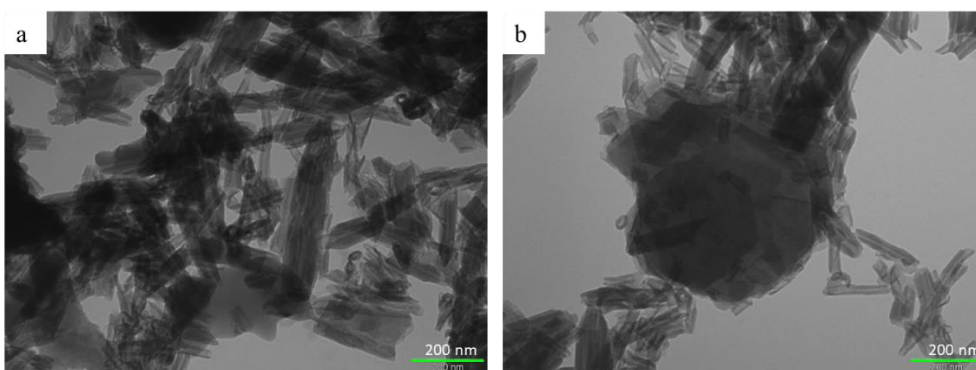

**Figure S11.** TEM images at 100kX magnification of (a) MH\_HCl\_2M, and (b) MH\_HCl\_4M.

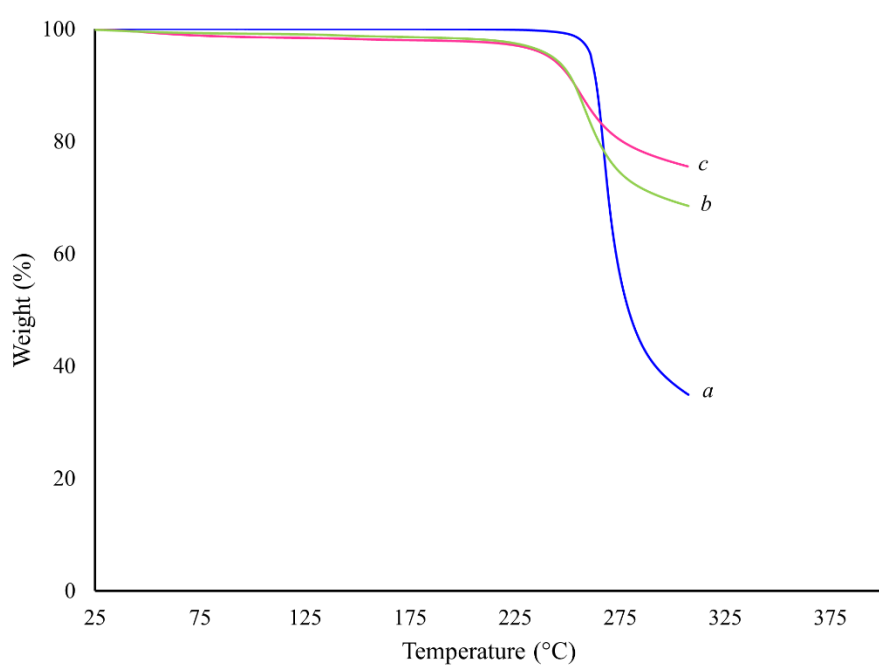

**Figure S12.** TG curves of (a) MEL, (b) MH, and (c) MH\_C.

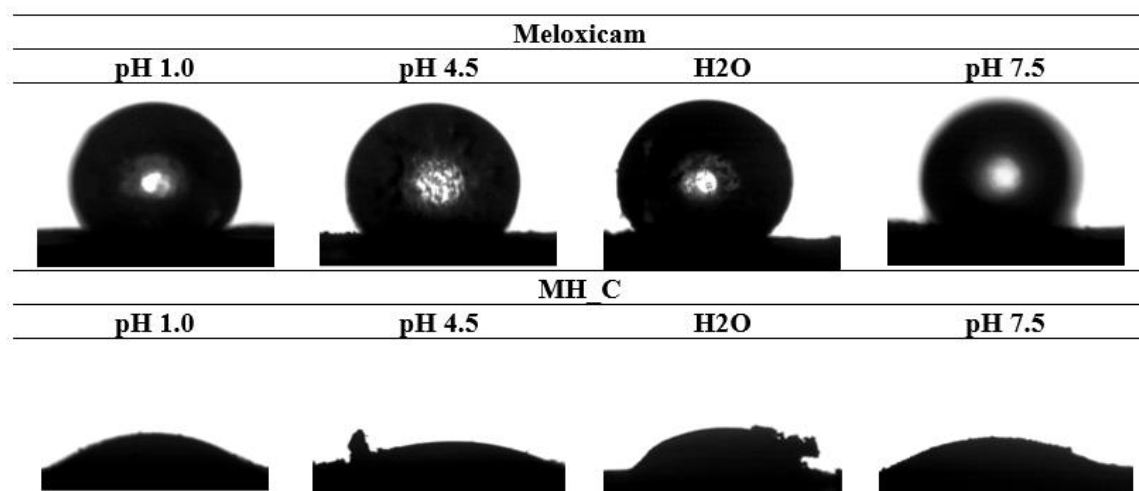

**Figure S13.** Contact angle test: images of MEL and MH\_C drops in the different fluids at the time of 30 sec.

**Table S1.** Crystallite size of meloxicam in the drug-clay samples.

| Sample                | MEL  | MH   | MH_HCl_2M | MH_HCl_4M | MH_NaOH_0.5M | MH_A | MH_C |
|-----------------------|------|------|-----------|-----------|--------------|------|------|
| Crystallite size (nm) | 68±3 | 66±2 | 48±4      | 57±3      | 50±4         | 61±2 | 58±3 |

**Table S2.** FT-IR bands and assignments.

| Assignments                                       |      | Position (cm <sup>-1</sup> ) |      |       |  |
|---------------------------------------------------|------|------------------------------|------|-------|--|
| Sample                                            | H    | MEL                          | CTS  | APTES |  |
| Al-OH stretching of inner-surface hydroxyl groups | 3690 | -                            | -    | -     |  |
| Al-OH stretching of inner hydroxyl groups         | 3619 | -                            | -    | -     |  |
| O-H stretching of interlayer water                | 3545 | -                            | -    | -     |  |
| O-H stretching                                    | -    | -                            | 3360 | -     |  |
| N-H stretching of amidic group                    | -    | 3285                         | -    | -     |  |
| N-H stretching                                    | -    | -                            | 3278 | -     |  |
| C-H stretching                                    | -    | -                            | -    | 2973  |  |
|                                                   |      |                              |      | 2927  |  |
|                                                   |      |                              |      | 2882  |  |
| C-H symmetric stretching                          | -    | -                            | 2911 | -     |  |
| C-H asymmetric stretching                         | -    | -                            | 2865 | -     |  |
| C=O stretching of amide I                         | -    | -                            | 1651 | -     |  |
| O-H deformation of water                          | 1647 | -                            | -    | -     |  |
| C=O stretching of amidic group                    | -    | 1616                         | -    | -     |  |
| N-H bending of primary amine                      | -    | -                            | 1584 | -     |  |
| N-H bending of amide II                           | -    | -                            | 1560 | -     |  |
| Stretching of aromatic ring                       | -    | 1548                         | -    | -     |  |
|                                                   |      | 1524                         |      |       |  |
|                                                   |      | 1456                         |      |       |  |
|                                                   |      | 1446                         |      |       |  |
| N-H stretching and bending                        | -    | -                            | -    | 1482  |  |
|                                                   |      |                              |      | 1440  |  |
| CH <sub>2</sub> bending                           | -    | -                            | 1419 | -     |  |
| CH <sub>3</sub> symmetrical deformation           | -    | -                            | 1372 | -     |  |
| Asymmetric stretching of SO <sub>2</sub> group    | -    | 1344                         | -    | -     |  |
| C-N stretching of amide III                       | -    | -                            | 1316 | -     |  |
| Symmetric stretching of SO <sub>2</sub> group     | -    | 1182                         | -    | -     |  |
| Symmetric stretching of C-O-C bridge              | -    | -                            | 1151 | -     |  |
| Stretching vibration of C-O group                 | -    | 1118                         | -    | -     |  |
| Si-O stretching                                   | 1117 | -                            | -    | -     |  |
| C-O stretching                                    | -    | -                            | 1062 | -     |  |
|                                                   |      |                              | 1027 |       |  |
| Stretching vibration of C-N group                 | -    | 1042                         | -    | -     |  |
| Si-O-Si stretching                                | 1011 | -                            | -    | -     |  |
| Al-O-H bending                                    | 902  | -                            | -    | -     |  |



**Table S3.** Meloxicam weight percentage in drug-clays systems evaluated by EDS microanalysis.

| Sample          | MH       | MH_HCl_2M | MH_HCl_4M | MH_NaOH_0.5M | MH_A     | MH_C     |
|-----------------|----------|-----------|-----------|--------------|----------|----------|
| Meloxicam (wt%) | 40.0±3.2 | 35.4±4.4  | 31.0±4.1  | 40.0±2.7     | 36.2±3.7 | 42.5±4.1 |
